# Supplementary material for: A Novel Algorithm Using Cell Population Data (VCS Parameters) as a Screening Discriminant between Alpha and Beta Thalassemia Traits
Source: MDPI journal article supplement (doi:10.3390/diagnostics11112163), 2021-11-22
Supplement: s1 [file s1]

**1. Cell population data (CPD) for reticulocyte related parameters available in UniceL DxH800 full blood count analyser by Beckman Coulter**

| Parameter                                               | Mean Retic     | SD Retic         | Mean Non-Retic  | SD Non-Retic      |
|---------------------------------------------------------|----------------|------------------|-----------------|-------------------|
| <b>Volume</b>                                           | @MN-V-RET      | @SD-V-RET        | @MN-V-NRET      | @SD-V-NRET        |
| <b>Conductivity</b>                                     | @MN-C- RET     | @ SD -C- RET     | @MN-C- NRET     | @ SD -C- NRET     |
| <b>Upper Median Angle Light Scatter (UMALS) 20°-42°</b> | @MN-UMALS- RET | @ SD -UMALS- RET | @MN-UMALS- NRET | @ SD -UMALS- NRET |
| <b>Lower Median Angle Light Scatter (LMALS) 10°-20°</b> | @MN-LMALS- RET | @ SD -LMALS- RET | @MN-LMALS- NRET | @ SD -LMALS- NRET |
| <b>Low Angle Light Scatter (LALS) 5.1°</b>              | @MN-LALS- RET  | @ SD -LALS- RET  | @MN-LALS- NRET  | @ SD -LALS- NRET  |
| <b>Axial Light Loss (ALL) A°</b>                        | @MN-AL2- RET   | @ SD-MN-AL2- RET | @MN-AL2- NRET   | @ SD-MN-AL2- NRET |
| <b>MALS, (UMALS+LMALS)</b>                              | @MN-MALS- RET  | @ SD -MALS- RET  | @MN-MALS- NRET  | @ SD -MALS- NRET  |

Footnote:

Abbreviations:

MN= Mean, SD= Standard Deviation, volume (V), conductivity (C), Axial Light Loss (ALL) A°, Low Angle Light Scatter (LALS) 5.1°, Lower Median Angle Light Scatter (LMALS) 10°-20°, Upper Median Angle Light Scatter (UMALS) 20°-42°, MALS, (UMALS+LMALS)

Example of interpretation of the table:

@MN-V-RET = Mean volume of reticulocyte

@SD-V- RET = Standard deviation volume of reticulocyte

@MN-MALS- RET = Mean of scatter angle MALS for reticulocyte

@SD-MALS- RET = Standard deviation of Mean of scatter angle MALS for reticulocyte

**2. Microcytic Anaemia Factor (MAF) is a calculated formula available in UniceL DxH800 full blood count analyser by Beckman Coulter**

|                                                        |
|--------------------------------------------------------|
| $\text{MAF} = (\text{Haemoglobin} * \text{MCV}) / 100$ |
|--------------------------------------------------------|
